# Supplementary material for: A brief and efficient stimulus set to create the inverted U-shaped relationship between rhythmic complexity and the sensation of groove
Source: PubMed Central journal article supplement (PMC9119456; doi:10.1371/journal.pone.0266902), 2022-05-19
Supplement: pone.0266902.s001.pdf [file pone.0266902.s001.pdf]

Supporting Information

**A Brief and Efficient Stimulus Set to Create the Inverted U-Shaped Relationship between Rhythmic Complexity and the Sensation of Groove**

Jan Stupacher<sup>1,2</sup>, Markus Wrede<sup>3</sup>, Peter Vuust<sup>1</sup>

<sup>1</sup> Center for Music in the Brain, Department of Clinical Medicine, Aarhus University & The Royal Academy of Music Aarhus/Aalborg, Denmark

<sup>2</sup> Institute of Psychology, University of Graz, Austria

<sup>3</sup> Department of Clinical Medicine, Aarhus University, Denmark

Corresponding author:

Jan Stupacher  
Center for Music in the Brain  
Universitetsbyen 3, Building 1710  
8000 Aarhus C, Denmark  
ORCID: 0000-0002-2179-2508  
Email: [stupacher@clin.au.dk](mailto:stupacher@clin.au.dk)

**S1 Table. Individual groove ratings of participants.** The table shows all combinations of low, moderate, and high rhythmic complexities (LR, MR, and HR, respectively) with low, moderate, and high harmonic complexities (LH, MH, and HH, respectively). Ratings were given on a continuous scale from 1 on the left to 101 on the right. Participants could not see these values.

| Participant | LR_LH | LR_MH | LR_HH | MR_LH | MR_MH | MR_HH | HR_LH | HR_MH | HR_HH | Singing | Instrument |
|-------------|-------|-------|-------|-------|-------|-------|-------|-------|-------|---------|------------|
| 1           | 10    | 17    | 15    | 60    | 82    | 69    | 1     | 6     | 6     | no      | yes        |
| 2           | 64    | 62    | 56    | 64    | 57    | 54    | 32    | 41    | 32    | no      | no         |
| 3           | 1     | 1     | 1     | 101   | 87    | 1     | 1     | 1     | 1     | no      | yes        |
| 4           | 101   | 76    | 80    | 101   | 101   | 101   | 101   | 69    | 53    | no      | yes        |
| 5           | 40    | 47    | 21    | 50    | 48    | 53    | 1     | 9     | 1     | no      | no         |
| 6           | 41    | 42    | 27    | 101   | 74    | 52    | 10    | 18    | 1     | no      | yes        |
| 7           | 13    | 1     | 1     | 88    | 74    | 76    | 1     | 1     | 24    | no      | no         |
| 8           | 84    | 67    | 63    | 95    | 67    | 71    | 27    | 28    | 4     | no      | yes        |
| 9           | 9     | 1     | 22    | 73    | 46    | 22    | 1     | 1     | 1     | no      | no         |
| 10          | 48    | 40    | 40    | 52    | 51    | 51    | 14    | 11    | 19    | yes     | yes        |
| 11          | 62    | 73    | 72    | 89    | 82    | 59    | 9     | 19    | 4     | no      | yes        |
| 12          | 58    | 21    | 40    | 56    | 65    | 50    | 5     | 8     | 1     | yes     | yes        |
| 13          | 52    | 23    | 65    | 51    | 87    | 30    | 9     | 7     | 3     | no      | yes        |
| 14          | 85    | 94    | 80    | 80    | 69    | 85    | 1     | 7     | 1     | no      | yes        |
| 15          | 72    | 59    | 1     | 101   | 1     | 33    | 1     | 1     | 1     | no      | yes        |
| 16          | 71    | 70    | 71    | 64    | 82    | 40    | 29    | 61    | 18    | yes     | no         |
| 17          | 47    | 67    | 58    | 60    | 55    | 54    | 37    | 39    | 38    | no      | no         |
| 18          | 21    | 73    | 37    | 79    | 84    | 84    | 24    | 7     | 7     | no      | yes        |
| 19          | 75    | 26    | 1     | 65    | 58    | 1     | 1     | 1     | 1     | yes     | no         |
| 20          | 52    | 44    | 40    | 78    | 75    | 74    | 25    | 12    | 16    | no      | yes        |
| 21          | 18    | 13    | 9     | 89    | 62    | 68    | 51    | 9     | 26    | no      | yes        |
| 22          | 40    | 40    | 20    | 71    | 65    | 64    | 9     | 13    | 8     | yes     | yes        |
| 23          | 13    | 16    | 2     | 64    | 64    | 98    | 12    | 21    | 1     | no      | no         |
| 24          | 69    | 63    | 61    | 93    | 56    | 57    | 44    | 45    | 39    | no      | yes        |
| 25          | 63    | 64    | 26    | 97    | 101   | 17    | 61    | 42    | 1     | yes     | yes        |
| 26          | 68    | 51    | 1     | 85    | 88    | 61    | 1     | 8     | 1     | no      | yes        |
| 27          | 23    | 32    | 9     | 80    | 46    | 43    | 43    | 28    | 25    | no      | no         |
| 28          | 10    | 21    | 8     | 50    | 51    | 54    | 12    | 48    | 48    | yes     | yes        |
| 29          | 8     | 15    | 9     | 53    | 42    | 47    | 1     | 1     | 12    | no      | yes        |
| 30          | 49    | 60    | 53    | 50    | 59    | 58    | 49    | 56    | 53    | no      | no         |
| 31          | 57    | 52    | 6     | 101   | 76    | 94    | 19    | 2     | 1     | no      | yes        |
| 32          | 73    | 58    | 6     | 42    | 71    | 2     | 82    | 74    | 88    | no      | yes        |
| 33          | 71    | 73    | 14    | 101   | 80    | 36    | 74    | 52    | 36    | no      | yes        |
| 34          | 21    | 30    | 16    | 60    | 39    | 31    | 8     | 17    | 9     | no      | yes        |
| 35          | 36    | 34    | 36    | 54    | 48    | 38    | 44    | 50    | 20    | yes     | no         |
| 36          | 69    | 62    | 71    | 87    | 77    | 75    | 56    | 62    | 58    | no      | no         |
| 37          | 53    | 64    | 58    | 62    | 95    | 70    | 11    | 46    | 4     | no      | yes        |
| 38          | 1     | 71    | 22    | 101   | 81    | 74    | 10    | 1     | 1     | no      | yes        |
| 39          | 92    | 27    | 44    | 78    | 71    | 34    | 59    | 60    | 16    | no      | no         |
| 40          | 61    | 48    | 5     | 35    | 75    | 40    | 8     | 37    | 2     | no      | yes        |
| 41          | 59    | 47    | 22    | 67    | 62    | 44    | 17    | 12    | 1     | no      | yes        |
| 42          | 82    | 58    | 65    | 78    | 89    | 58    | 25    | 19    | 19    | no      | no         |
| 43          | 51    | 35    | 60    | 81    | 72    | 22    | 36    | 37    | 10    | no      | no         |
| 44          | 42    | 45    | 24    | 84    | 51    | 30    | 33    | 12    | 1     | no      | no         |
| 45          | 51    | 53    | 44    | 56    | 53    | 21    | 48    | 47    | 8     | no      | yes        |
| 46          | 57    | 41    | 35    | 93    | 88    | 59    | 9     | 32    | 4     | yes     | yes        |
| 47          | 63    | 41    | 40    | 77    | 57    | 33    | 1     | 1     | 1     | yes     | yes        |
| 48          | 41    | 28    | 1     | 80    | 72    | 56    | 32    | 8     | 1     | no      | yes        |
| 49          | 53    | 58    | 61    | 88    | 78    | 77    | 36    | 26    | 29    | yes     | yes        |
| 50          | 62    | 23    | 7     | 92    | 91    | 18    | 43    | 23    | 9     | no      | yes        |
| 51          | 5     | 9     | 1     | 11    | 23    | 3     | 1     | 1     | 1     | no      | no         |
| 52          | 24    | 16    | 1     | 95    | 81    | 31    | 18    | 1     | 1     | yes     | yes        |
| 53          | 66    | 101   | 41    | 73    | 101   | 72    | 32    | 1     | 1     | no      | yes        |
| 54          | 59    | 55    | 54    | 68    | 87    | 64    | 56    | 64    | 37    | no      | yes        |

|     |     |    |    |     |     |    |     |    |    |     |     |
|-----|-----|----|----|-----|-----|----|-----|----|----|-----|-----|
| 55  | 31  | 32 | 53 | 90  | 67  | 55 | 22  | 1  | 10 | yes | yes |
| 56  | 62  | 59 | 58 | 86  | 87  | 80 | 32  | 47 | 43 | no  | no  |
| 57  | 72  | 46 | 49 | 71  | 77  | 55 | 52  | 13 | 4  | no  | no  |
| 58  | 15  | 36 | 13 | 45  | 43  | 58 | 20  | 25 | 5  | no  | yes |
| 59  | 65  | 34 | 14 | 66  | 52  | 53 | 47  | 41 | 63 | no  | yes |
| 60  | 24  | 21 | 20 | 50  | 47  | 46 | 51  | 51 | 34 | no  | no  |
| 61  | 23  | 26 | 26 | 90  | 71  | 36 | 9   | 10 | 34 | yes | yes |
| 62  | 49  | 46 | 34 | 70  | 63  | 47 | 15  | 22 | 9  | no  | yes |
| 63  | 66  | 71 | 72 | 93  | 85  | 87 | 1   | 37 | 28 | no  | no  |
| 64  | 93  | 91 | 60 | 101 | 101 | 66 | 68  | 76 | 58 | no  | yes |
| 65  | 22  | 39 | 33 | 88  | 71  | 47 | 5   | 28 | 9  | yes | yes |
| 66  | 43  | 38 | 34 | 83  | 66  | 60 | 13  | 20 | 16 | no  | yes |
| 67  | 54  | 51 | 28 | 84  | 58  | 63 | 56  | 51 | 7  | yes | no  |
| 68  | 63  | 59 | 63 | 84  | 76  | 78 | 82  | 73 | 82 | yes | yes |
| 69  | 44  | 46 | 35 | 75  | 46  | 60 | 20  | 9  | 3  | yes | yes |
| 70  | 53  | 56 | 63 | 66  | 54  | 52 | 24  | 16 | 24 | yes | yes |
| 71  | 36  | 47 | 1  | 70  | 64  | 28 | 25  | 10 | 16 | no  | yes |
| 72  | 46  | 31 | 45 | 53  | 68  | 50 | 13  | 3  | 1  | yes | yes |
| 73  | 48  | 47 | 55 | 66  | 74  | 53 | 48  | 34 | 12 | yes | yes |
| 74  | 11  | 10 | 8  | 19  | 14  | 10 | 1   | 1  | 1  | no  | no  |
| 75  | 30  | 25 | 8  | 94  | 67  | 37 | 21  | 23 | 9  | no  | yes |
| 76  | 70  | 83 | 82 | 86  | 81  | 71 | 65  | 65 | 60 | no  | yes |
| 77  | 38  | 39 | 6  | 64  | 77  | 64 | 22  | 34 | 14 | no  | yes |
| 78  | 32  | 47 | 1  | 73  | 64  | 18 | 5   | 21 | 7  | no  | yes |
| 79  | 54  | 49 | 1  | 57  | 60  | 42 | 101 | 24 | 1  | no  | no  |
| 80  | 53  | 53 | 52 | 91  | 87  | 67 | 10  | 22 | 1  | yes | no  |
| 81  | 47  | 36 | 3  | 67  | 57  | 65 | 41  | 8  | 9  | no  | yes |
| 82  | 2   | 2  | 3  | 53  | 2   | 7  | 56  | 1  | 2  | no  | no  |
| 83  | 101 | 68 | 88 | 87  | 87  | 90 | 1   | 1  | 7  | no  | yes |
| 84  | 68  | 38 | 10 | 97  | 89  | 48 | 30  | 14 | 1  | yes | yes |
| 85  | 54  | 1  | 1  | 59  | 49  | 8  | 29  | 24 | 26 | no  | no  |
| 86  | 64  | 94 | 1  | 83  | 69  | 66 | 1   | 9  | 1  | no  | yes |
| 87  | 32  | 33 | 36 | 49  | 48  | 45 | 13  | 17 | 1  | yes | yes |
| 88  | 93  | 66 | 39 | 85  | 80  | 73 | 25  | 19 | 12 | yes | no  |
| 89  | 64  | 66 | 36 | 85  | 54  | 61 | 15  | 11 | 13 | no  | no  |
| 90  | 1   | 1  | 3  | 35  | 18  | 5  | 4   | 3  | 1  | no  | no  |
| 91  | 95  | 67 | 4  | 100 | 81  | 7  | 14  | 1  | 1  | yes | yes |
| 92  | 20  | 41 | 61 | 76  | 73  | 81 | 34  | 10 | 30 | no  | no  |
| 93  | 26  | 5  | 1  | 57  | 60  | 8  | 1   | 1  | 1  | no  | yes |
| 94  | 34  | 39 | 55 | 62  | 54  | 61 | 18  | 11 | 35 | no  | yes |
| 95  | 22  | 22 | 19 | 68  | 66  | 35 | 12  | 17 | 1  | no  | yes |
| 96  | 40  | 55 | 28 | 58  | 56  | 56 | 20  | 21 | 1  | no  | no  |
| 97  | 57  | 28 | 19 | 90  | 69  | 73 | 41  | 1  | 1  | no  | yes |
| 98  | 69  | 59 | 56 | 48  | 81  | 56 | 1   | 27 | 1  | yes | no  |
| 99  | 49  | 50 | 20 | 67  | 70  | 64 | 48  | 25 | 23 | no  | yes |
| 100 | 9   | 20 | 3  | 33  | 32  | 18 | 27  | 34 | 3  | no  | yes |
| 101 | 56  | 60 | 61 | 59  | 59  | 66 | 40  | 22 | 29 | no  | no  |
| 102 | 28  | 55 | 1  | 77  | 53  | 12 | 24  | 9  | 1  | no  | no  |
| 103 | 97  | 71 | 73 | 89  | 101 | 77 | 1   | 1  | 1  | no  | no  |
| 104 | 62  | 53 | 59 | 74  | 75  | 62 | 59  | 35 | 43 | yes | no  |
| 105 | 47  | 44 | 63 | 87  | 101 | 84 | 10  | 39 | 1  | no  | yes |
| 106 | 49  | 36 | 36 | 68  | 77  | 41 | 27  | 3  | 6  | no  | yes |
| 107 | 53  | 35 | 18 | 75  | 72  | 58 | 1   | 1  | 1  | no  | no  |
| 108 | 64  | 61 | 86 | 89  | 65  | 93 | 11  | 13 | 10 | no  | yes |
| 109 | 97  | 80 | 33 | 71  | 63  | 36 | 9   | 1  | 25 | no  | yes |
| 110 | 68  | 76 | 71 | 77  | 87  | 70 | 22  | 28 | 57 | no  | yes |
| 111 | 37  | 36 | 30 | 55  | 41  | 46 | 26  | 12 | 9  | yes | no  |
| 112 | 56  | 33 | 29 | 57  | 52  | 38 | 27  | 42 | 36 | no  | no  |
| 113 | 73  | 43 | 63 | 78  | 83  | 68 | 42  | 24 | 46 | no  | yes |

|     |     |    |     |     |     |    |    |     |    |     |     |
|-----|-----|----|-----|-----|-----|----|----|-----|----|-----|-----|
| 114 | 27  | 48 | 58  | 62  | 53  | 46 | 25 | 16  | 1  | yes | yes |
| 115 | 20  | 31 | 20  | 43  | 45  | 43 | 27 | 29  | 30 | no  | no  |
| 116 | 30  | 26 | 14  | 37  | 42  | 17 | 30 | 14  | 19 | no  | yes |
| 117 | 8   | 13 | 9   | 47  | 39  | 18 | 1  | 3   | 1  | yes | yes |
| 118 | 22  | 23 | 25  | 82  | 101 | 62 | 1  | 11  | 1  | yes | yes |
| 119 | 31  | 25 | 7   | 65  | 58  | 27 | 17 | 47  | 1  | no  | yes |
| 120 | 22  | 32 | 1   | 30  | 61  | 9  | 1  | 1   | 1  | no  | yes |
| 121 | 65  | 67 | 47  | 71  | 82  | 59 | 1  | 1   | 1  | yes | yes |
| 122 | 61  | 55 | 43  | 59  | 76  | 41 | 19 | 7   | 8  | no  | yes |
| 123 | 57  | 19 | 15  | 74  | 69  | 46 | 21 | 1   | 2  | no  | yes |
| 124 | 64  | 79 | 62  | 82  | 83  | 71 | 21 | 9   | 4  | no  | no  |
| 125 | 66  | 56 | 23  | 73  | 66  | 52 | 9  | 1   | 2  | no  | no  |
| 126 | 42  | 27 | 34  | 92  | 75  | 87 | 11 | 46  | 9  | no  | yes |
| 127 | 7   | 14 | 10  | 45  | 45  | 27 | 3  | 4   | 4  | no  | yes |
| 128 | 5   | 10 | 8   | 31  | 29  | 22 | 1  | 1   | 6  | no  | no  |
| 129 | 27  | 12 | 8   | 49  | 47  | 13 | 24 | 9   | 7  | yes | no  |
| 130 | 66  | 63 | 45  | 93  | 70  | 57 | 11 | 20  | 12 | no  | yes |
| 131 | 68  | 40 | 58  | 68  | 58  | 34 | 55 | 23  | 42 | yes | no  |
| 132 | 45  | 44 | 22  | 45  | 59  | 24 | 28 | 41  | 16 | no  | yes |
| 133 | 58  | 54 | 46  | 70  | 73  | 50 | 56 | 43  | 37 | no  | no  |
| 134 | 51  | 48 | 16  | 67  | 65  | 70 | 21 | 1   | 9  | no  | no  |
| 135 | 59  | 53 | 57  | 83  | 80  | 65 | 67 | 31  | 31 | no  | no  |
| 136 | 22  | 11 | 51  | 70  | 101 | 27 | 1  | 12  | 1  | no  | no  |
| 137 | 66  | 61 | 21  | 88  | 81  | 21 | 28 | 13  | 4  | no  | yes |
| 138 | 10  | 1  | 7   | 33  | 29  | 1  | 2  | 1   | 1  | no  | no  |
| 139 | 36  | 31 | 27  | 69  | 48  | 16 | 25 | 9   | 21 | no  | no  |
| 140 | 56  | 81 | 14  | 69  | 28  | 61 | 35 | 60  | 8  | yes | no  |
| 141 | 4   | 40 | 20  | 86  | 63  | 59 | 36 | 17  | 6  | no  | no  |
| 142 | 29  | 36 | 32  | 52  | 51  | 35 | 17 | 35  | 1  | no  | yes |
| 143 | 64  | 41 | 16  | 79  | 23  | 64 | 32 | 19  | 9  | yes | no  |
| 144 | 45  | 68 | 1   | 72  | 65  | 11 | 1  | 1   | 1  | no  | yes |
| 145 | 50  | 50 | 34  | 59  | 59  | 35 | 37 | 25  | 25 | no  | yes |
| 146 | 20  | 30 | 12  | 59  | 38  | 42 | 33 | 14  | 11 | no  | no  |
| 147 | 34  | 58 | 63  | 68  | 61  | 40 | 65 | 65  | 65 | no  | no  |
| 148 | 28  | 30 | 23  | 70  | 34  | 22 | 28 | 54  | 25 | no  | no  |
| 149 | 23  | 40 | 10  | 77  | 65  | 53 | 6  | 7   | 10 | no  | yes |
| 150 | 79  | 73 | 9   | 18  | 1   | 13 | 6  | 1   | 1  | yes | no  |
| 151 | 53  | 42 | 40  | 71  | 91  | 15 | 1  | 24  | 1  | no  | no  |
| 152 | 45  | 36 | 28  | 70  | 65  | 39 | 5  | 13  | 5  | no  | no  |
| 153 | 41  | 22 | 25  | 51  | 19  | 19 | 14 | 1   | 1  | no  | no  |
| 154 | 89  | 92 | 24  | 93  | 93  | 91 | 14 | 5   | 1  | no  | yes |
| 155 | 63  | 67 | 64  | 101 | 101 | 92 | 8  | 36  | 28 | no  | yes |
| 156 | 31  | 20 | 34  | 28  | 36  | 19 | 37 | 41  | 1  | no  | yes |
| 157 | 70  | 75 | 85  | 100 | 96  | 7  | 16 | 19  | 14 | no  | yes |
| 158 | 46  | 60 | 8   | 57  | 77  | 17 | 1  | 28  | 1  | no  | yes |
| 159 | 75  | 18 | 66  | 85  | 46  | 31 | 7  | 2   | 8  | no  | no  |
| 160 | 33  | 28 | 19  | 98  | 33  | 96 | 1  | 4   | 23 | no  | no  |
| 161 | 46  | 36 | 33  | 66  | 53  | 24 | 2  | 1   | 1  | no  | no  |
| 162 | 35  | 48 | 36  | 55  | 25  | 52 | 13 | 29  | 26 | no  | no  |
| 163 | 79  | 79 | 68  | 80  | 83  | 79 | 9  | 25  | 18 | no  | yes |
| 164 | 101 | 92 | 87  | 88  | 86  | 92 | 88 | 101 | 90 | yes | yes |
| 165 | 61  | 34 | 46  | 77  | 61  | 49 | 37 | 36  | 21 | no  | yes |
| 166 | 1   | 38 | 101 | 99  | 101 | 1  | 1  | 1   | 1  | no  | no  |
| 167 | 43  | 55 | 31  | 46  | 66  | 63 | 11 | 50  | 34 | no  | no  |
| 168 | 16  | 25 | 29  | 55  | 67  | 50 | 1  | 1   | 1  | no  | yes |
| 169 | 33  | 14 | 1   | 84  | 72  | 54 | 27 | 11  | 1  | no  | no  |
